# Supplementary material for: Engineering the surface morphology of inkjet printed Ag by controlling solvent evaporation during plasma conversion of AgNO3 inks
Source: Royal Society of Chemistry journal article supplement (doi:10.1039/d1tc06174g), 2022-01-01
Supplement: d1tc06174g1.pdf [file d1tc06174g1.pdf]

## Supporting Information

### Engineering the Surface Morphology of Inkjet Printed Ag by Controlling Solvent Evaporation during Plasma Conversion of AgNO<sub>3</sub> Inks

Yongkun Sui,<sup>\*a</sup> Allison Hess-Dunning<sup>b</sup>, Aziz N. Radwan<sup>a</sup>, R. Mohan Sankaran<sup>c</sup> and Christian A. Zorman<sup>\*a</sup>

*a. Electrical, Computer, and Systems Engineering, Case Western Reserve University, OH, USA*

*b. Advanced Platform Technology Center, Louis Stokes Cleveland Department of Veterans Affairs Medical Center, Cleveland, OH, USA*

*c. Nuclear, Plasma & Radiological Engineering, University of Illinois Urbana-Champaign, IL, USA*

*ysui@sandia.gov; caz@case.edu*

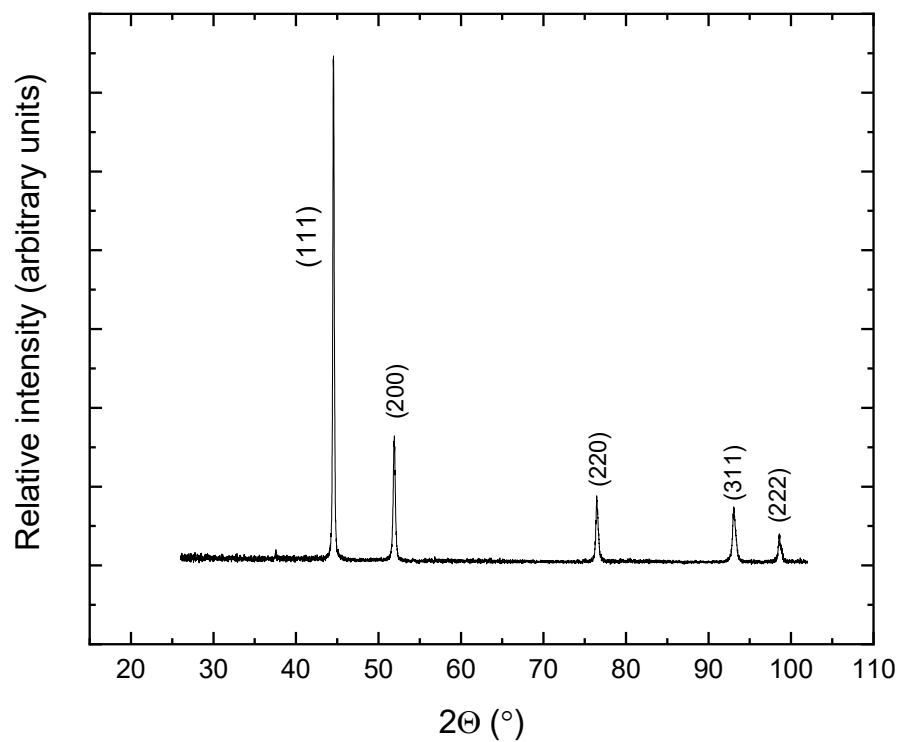

**Fig. S1.** X-ray diffraction (XRD) analysis on the surface of printed and plasma-converted Ag. The spectrum only shows peaks associated with elemental Ag crystal orientations [(111), (200), (220), (311), (222)], indicating that within the XRD information depth (a few hundred nanometers) the printed structure contains only Ag.

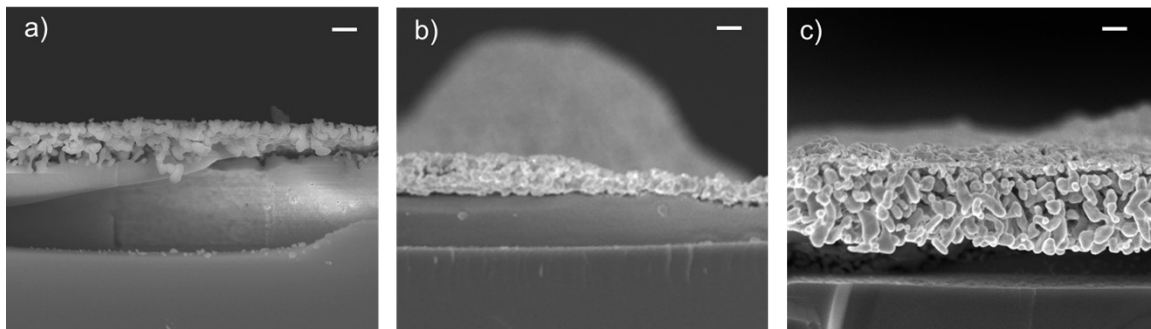

**Fig. S2.** Higher magnification cross-sectional SEM images of (a) Ag(EG), (b) Ag(diEG), and (c) Ag(triEG).

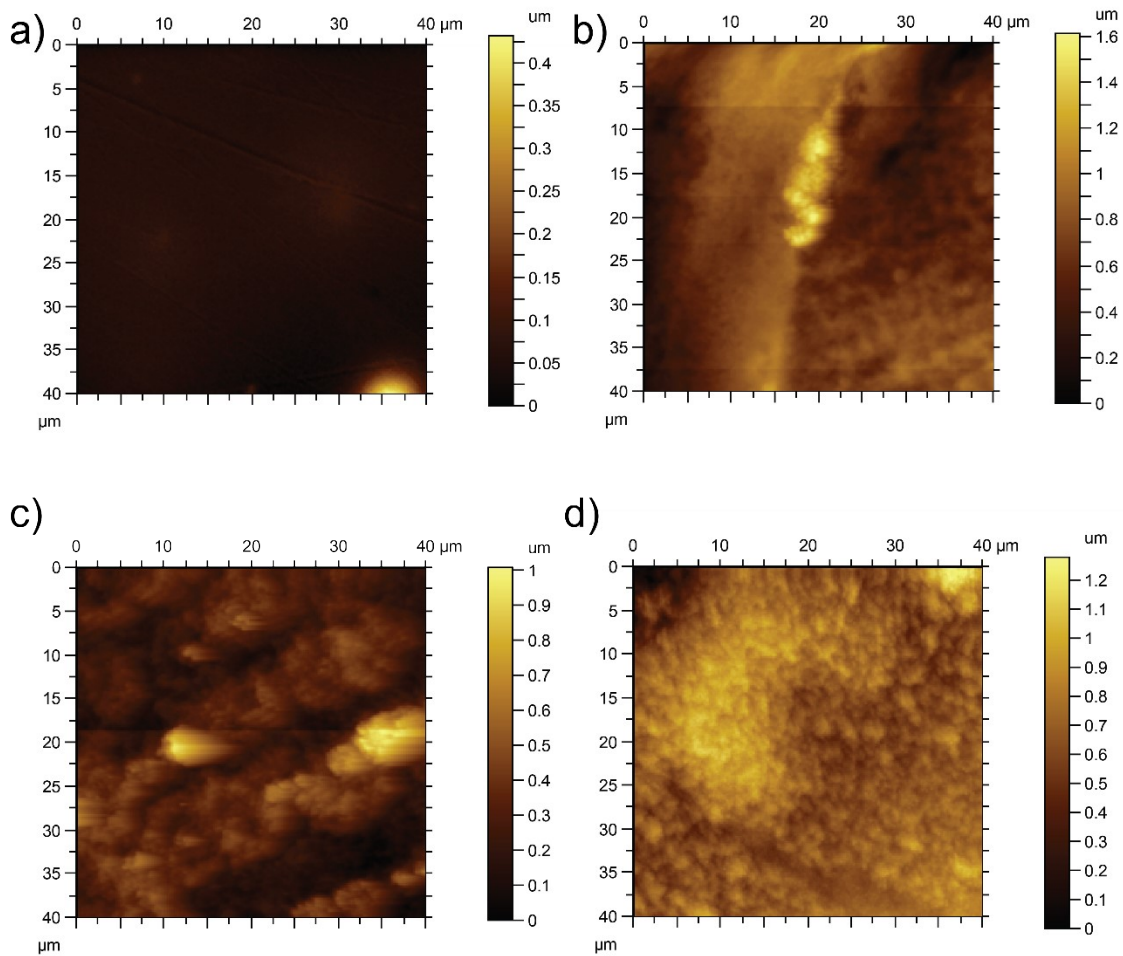

**Fig. S3.** Atomic force microscopy (AFM) topography plot of (a) sputtered Ag, (b) Ag(EG), (c) Ag(diEG), and (d) Ag(triEG). AFM shows similar results as optical profilometry. Ag (EG) is relatively smooth and has a big peak in the selected region. Ag(diEG) is rougher than Ag (EG) and has more peaks in a small area. The peaks in the Ag(diEG) are clustered together. Ag(triEG) is the roughest with peaks covers the entire selected region.

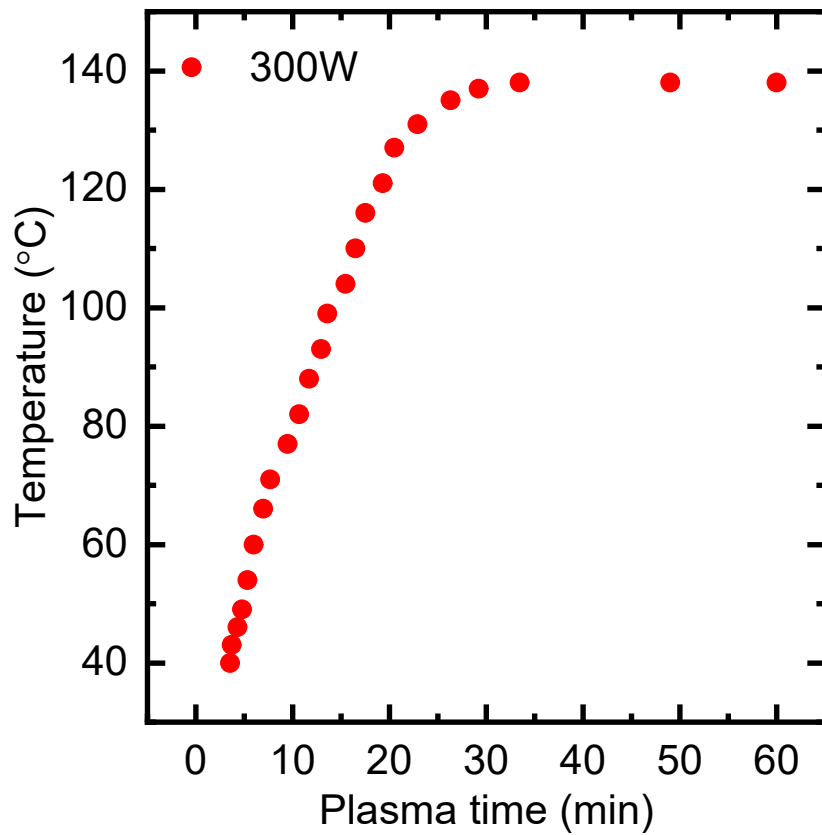

**Fig. S4.** Plasma chamber temperature at 300 W power as a function of time.

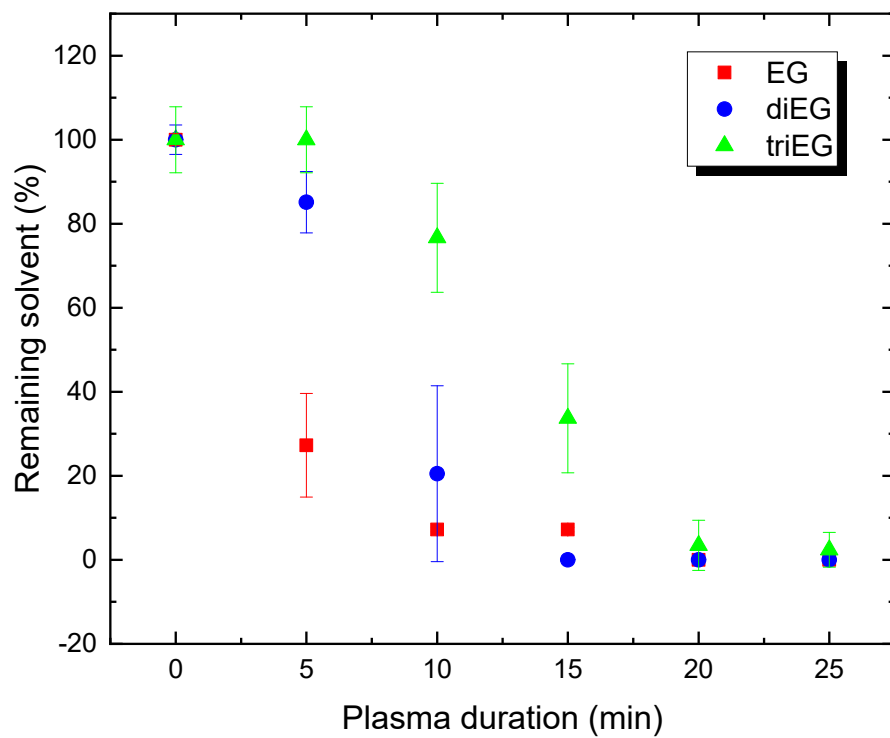

**Fig. S5.** Evaporation rate of EG, diEG, and triEG in the low-pressure plasma system. The Ar background pressure was 650 mTorr and the plasma power was 300 W
